# Supplementary material
Source: publisher figshare collection journal article supplement (https://gsajournals.figshare.com/articles/dataset/_/14345426)
Supplement: Supplementary file 1 [file 1]

**A**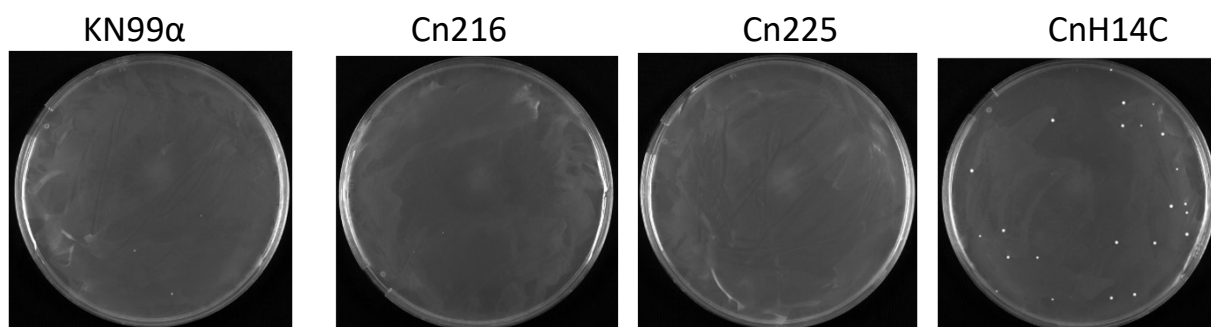**B**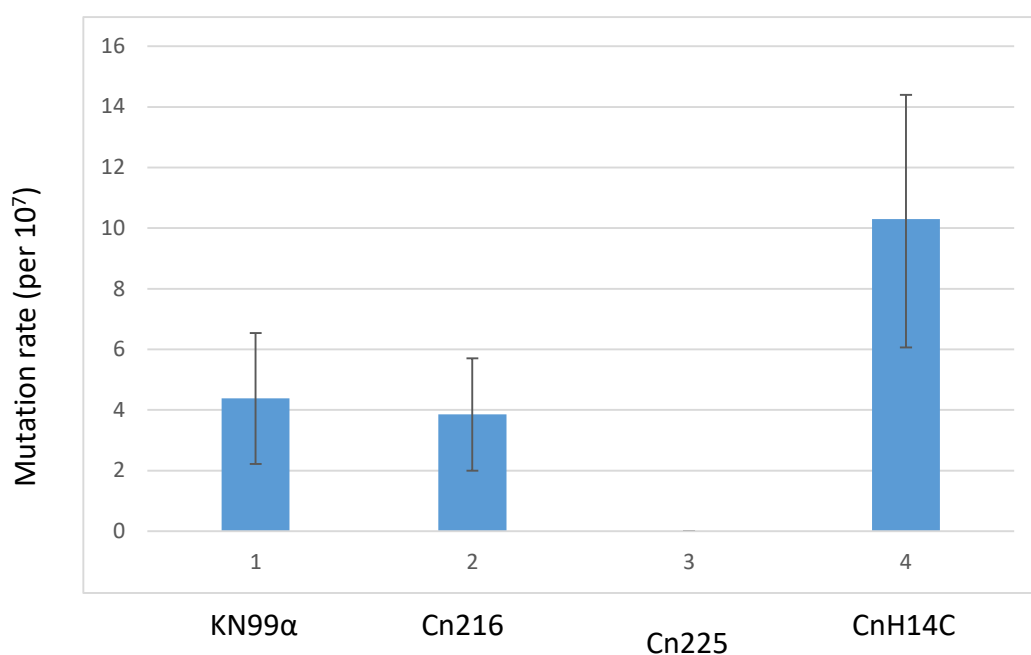

Figure S2. CnH14C display an elevated mutation rate (A) Spontaneous 5-FOA-resistant colonies in a standard wild-type (KN99α) isolate and in three Brazilian isolates (e.g., Cn216, Cn225 and CnH14C).. (B) Quantitative assessment of mutation rates in the four strains using fluctuation analysis of the spontaneous resistance to 5-FOA. The Lea-Coulson method of the median was used to estimate the number of mutations from the observed values of mutants from 10 independent parallel cultures. Error bars indicate 95% confidence intervals
