# Supplementary material
Source: publisher figshare collection journal article supplement (https://gsajournals.figshare.com/articles/dataset/_/14345426)

Figure S3

Growth of the *Cryptococcus* Brazilian isolates at YPD30-48h (A)

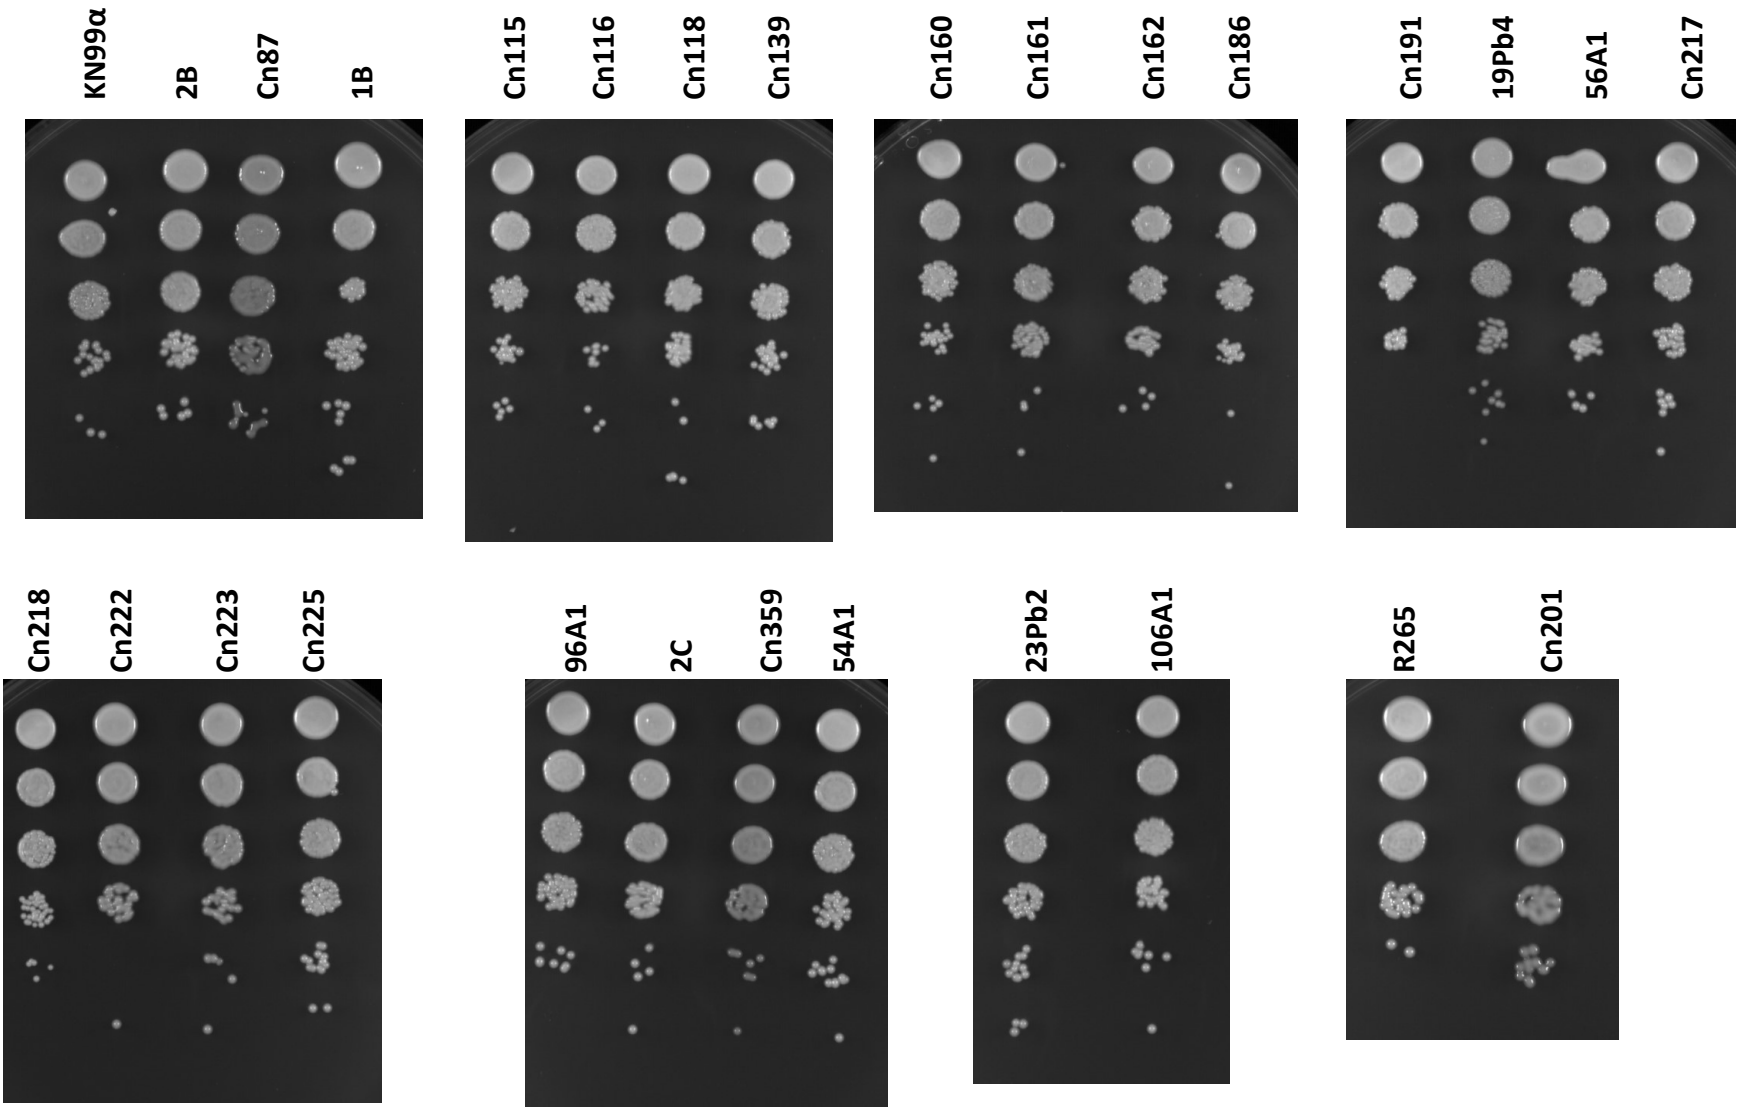

YPD30-48h

Growth of the Cryptococcus Brazilian isolates at YPD30-48h (B)

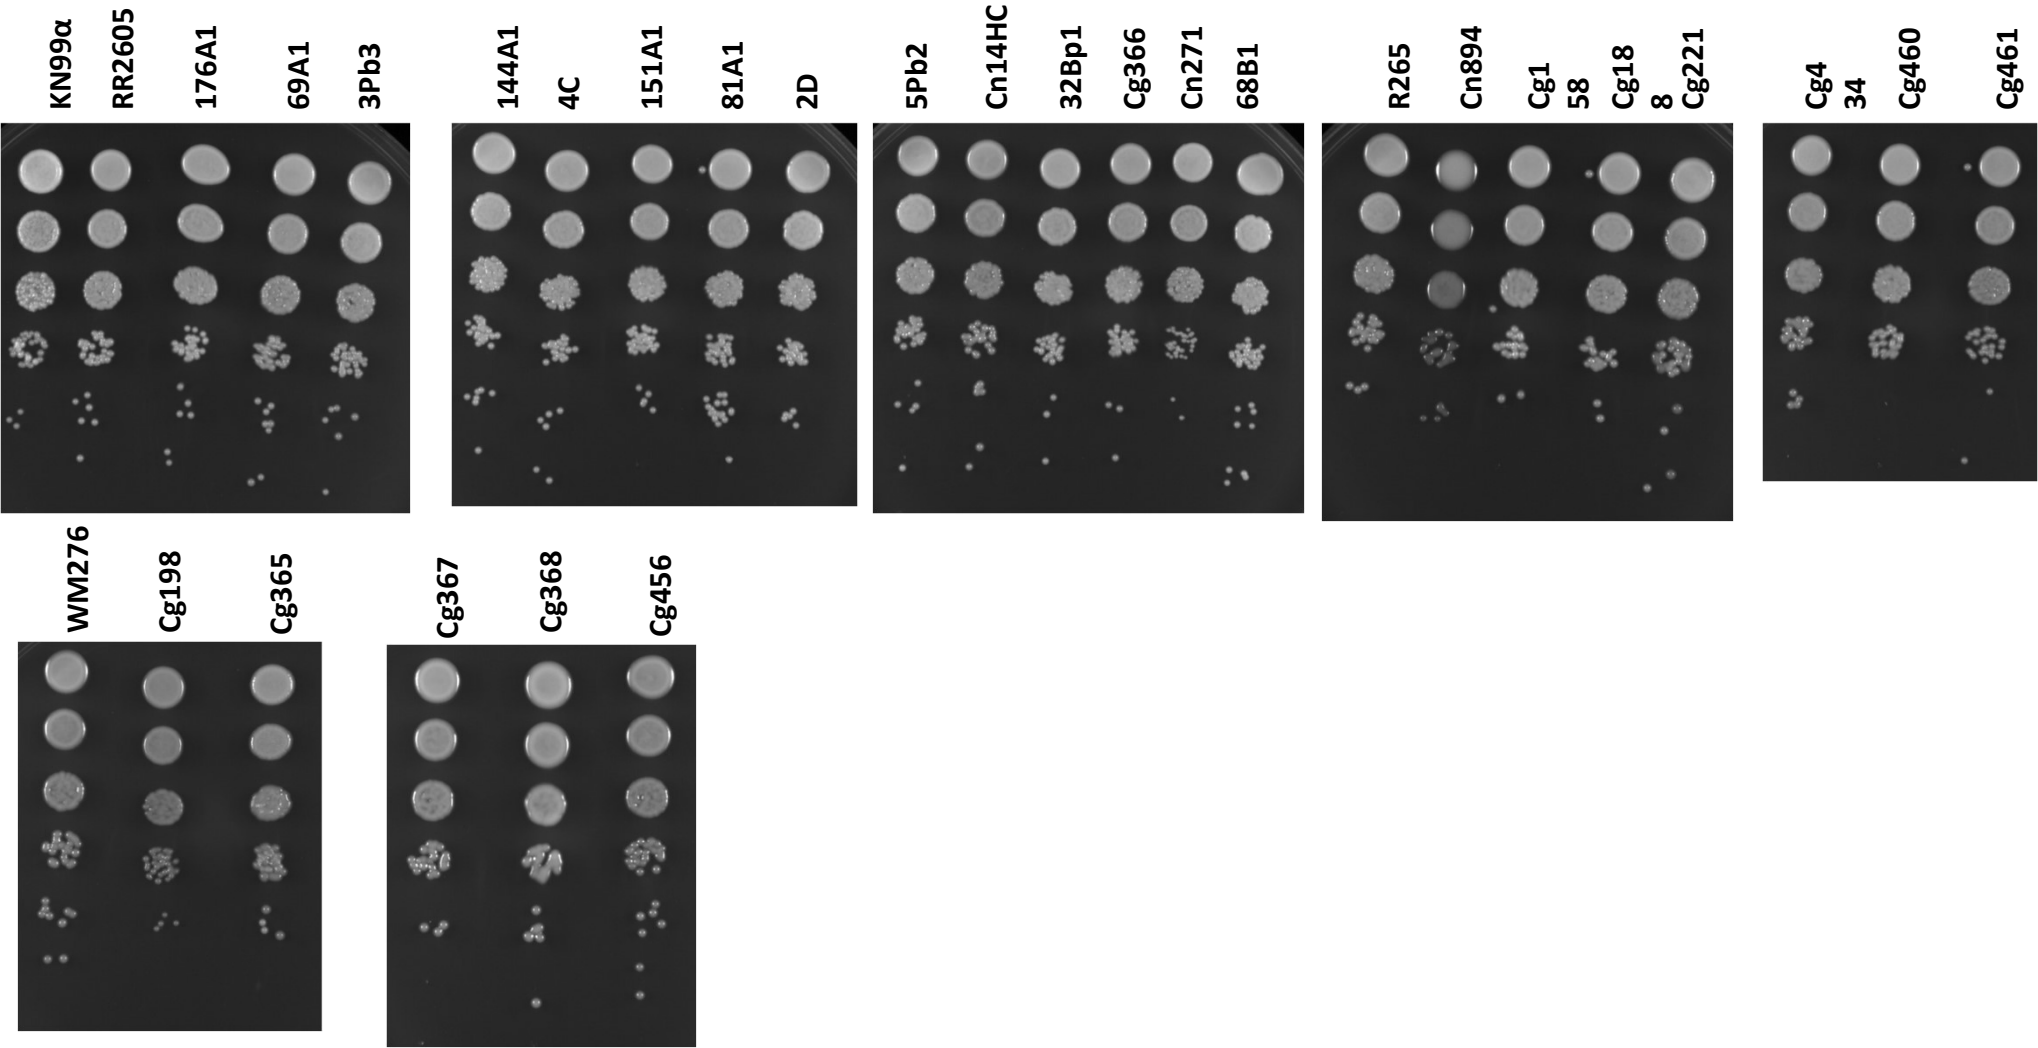

YPD30-48h

Growth of the Cryptococcus Brazilian isolates at YPD37-48h (A)

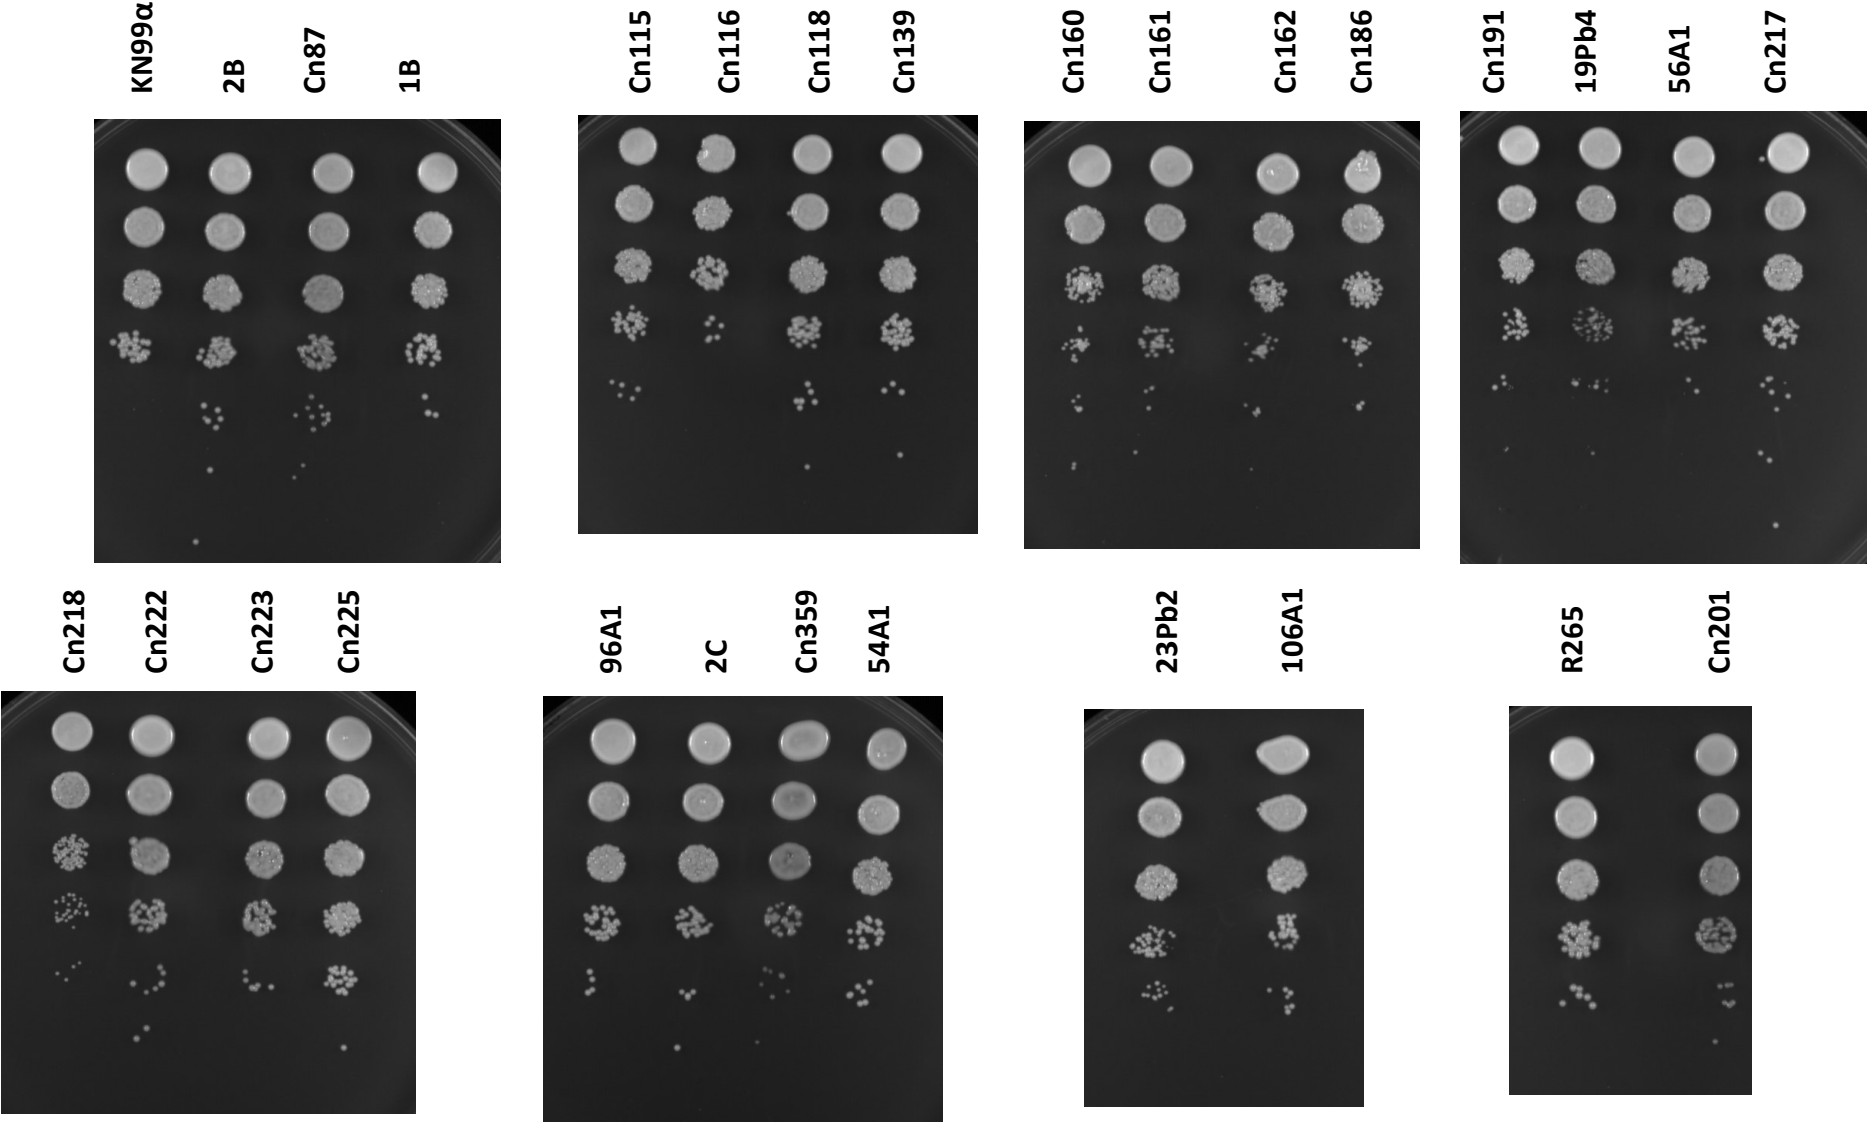

YPD37-48h

Growth of the Cryptococcus Brazilian isolates at YPD37-48h (B)

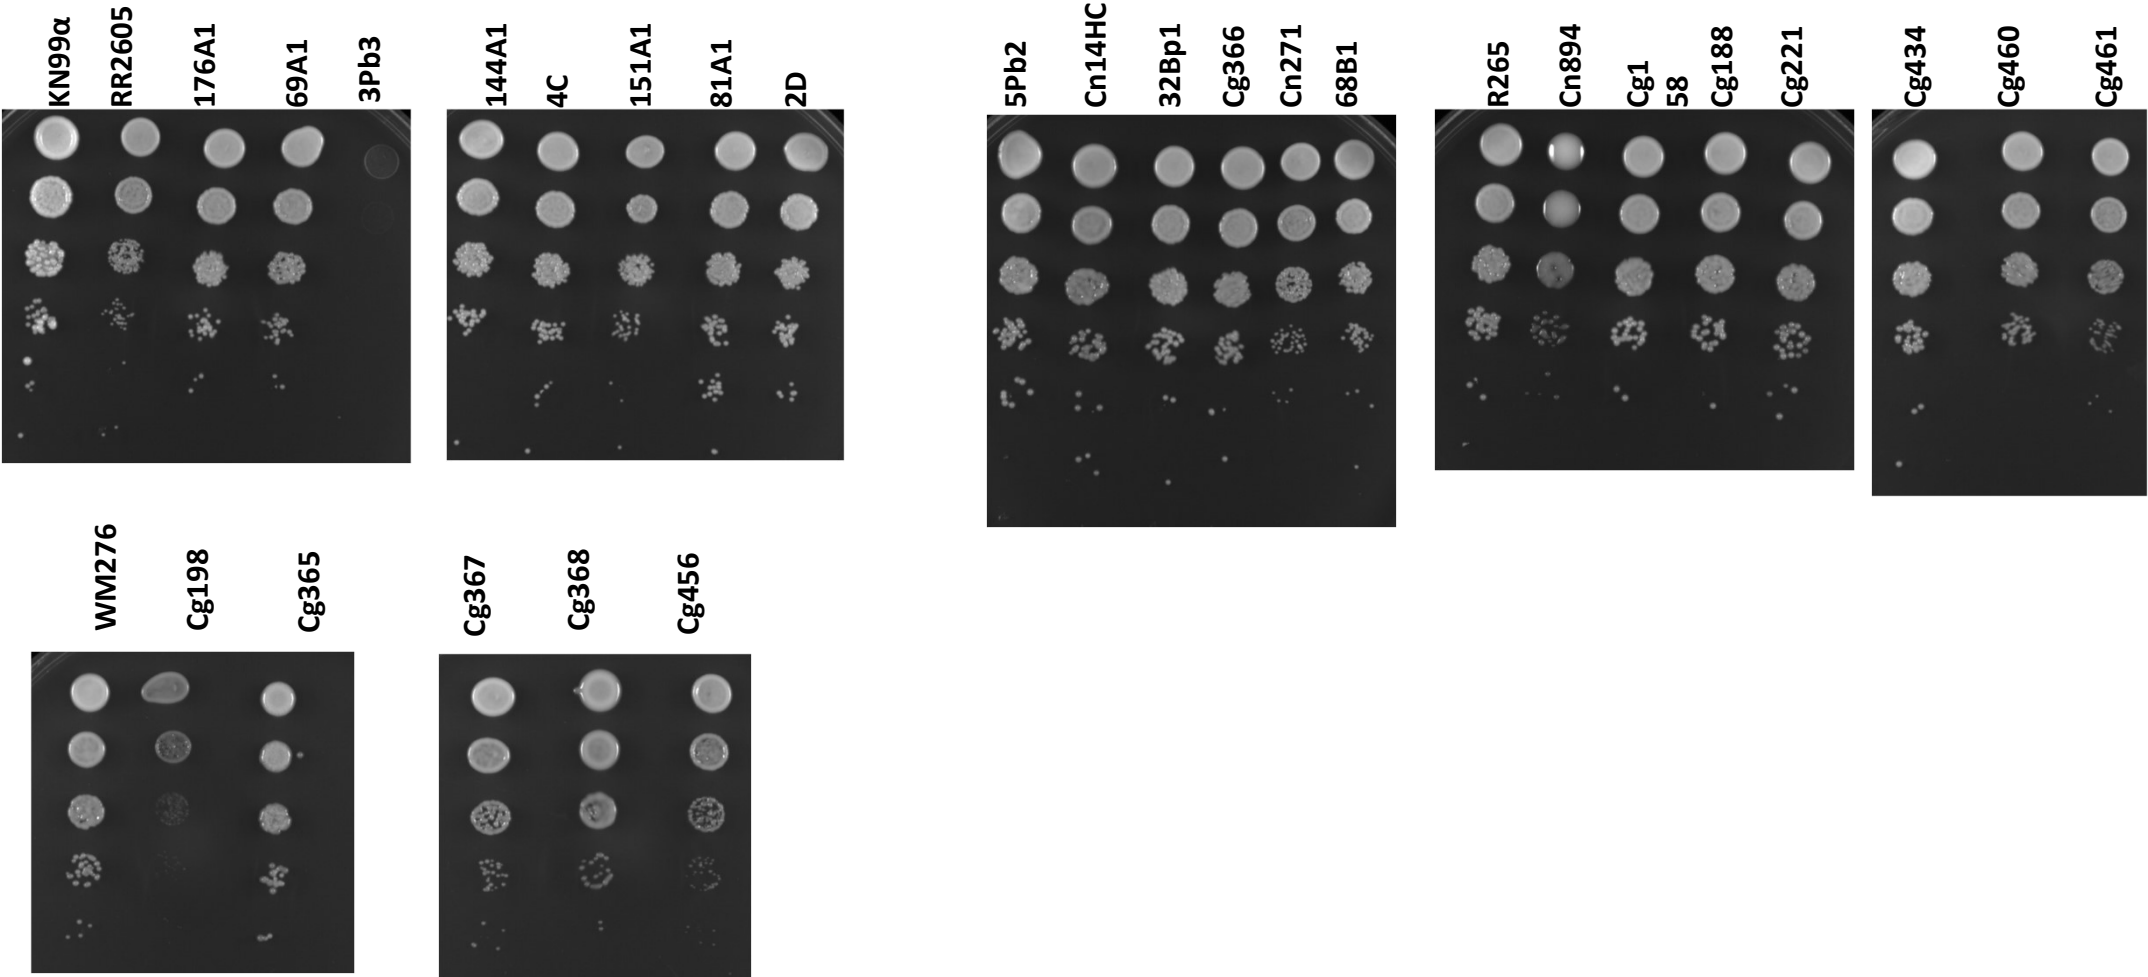

Supplement: Supplementary file 3 [file 1]
