# Supplementary material
Source: publisher figshare collection journal article supplement (https://gsajournals.figshare.com/articles/dataset/_/14345426)
Supplement: Supplementary file 4 [file 1]

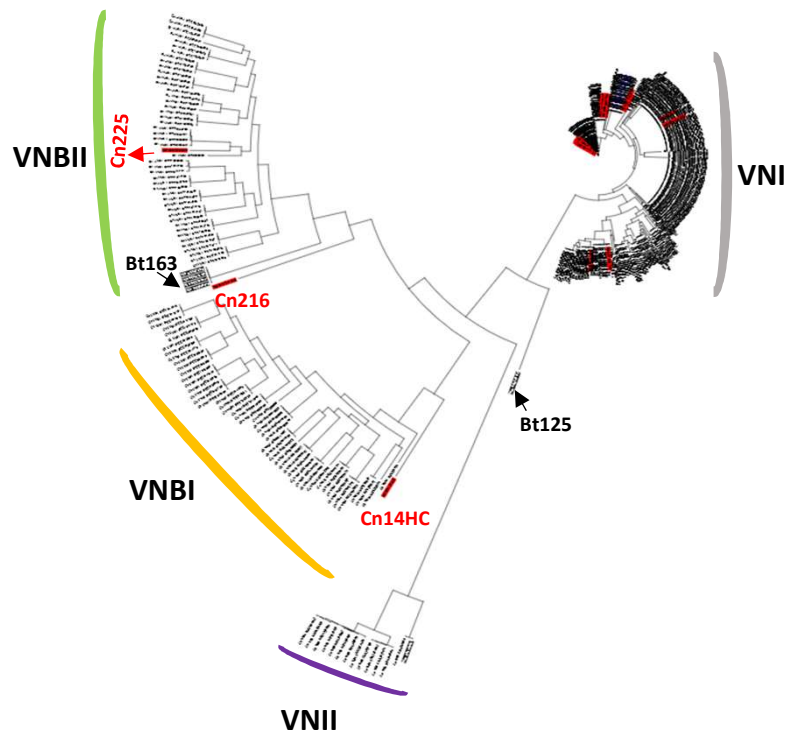

Fig. S1. Phylogenetic tree generated by iTOL v5 using the *C. neoformans* genomes sequences. The Brazilian isolates are indicated in red. The two Brazilian outlier isolates are indicated. The position of the hybrid strains are indicated in grey.
